# Supplementary material for: Tunable metal-enhanced fluorescence by pH-responsive polyacryloyl hydrazide capped Ag nanoparticles
Source: Royal Society of Chemistry journal article supplement (doi:10.1039/c6ra27193f), 2017-01-01
Supplement: c6ra27193f1.pdf [file c6ra27193f1.pdf]

## Supporting Information

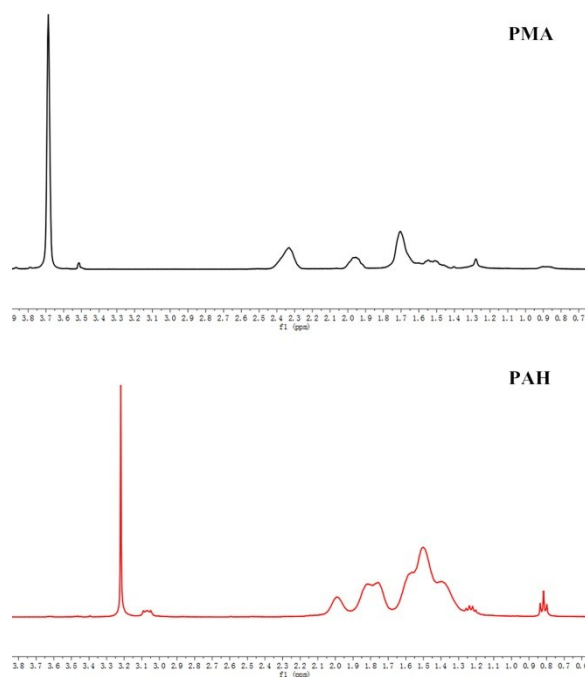

**Fig. S1** <sup>1</sup>H NMR spectra of PMA and PAH polymer.

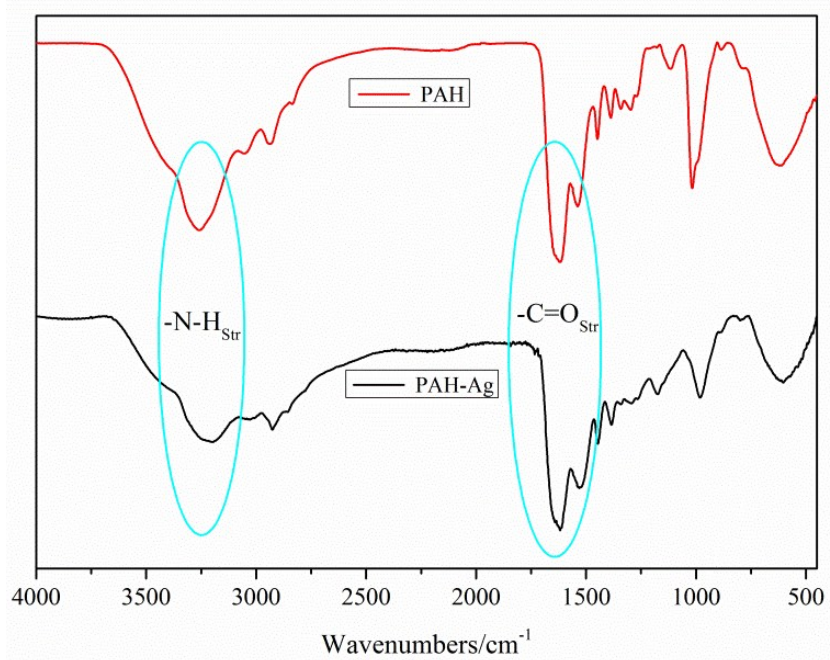

**Fig. S2** FTIR spectra of PAH-Ag NPs and PAH polymer.

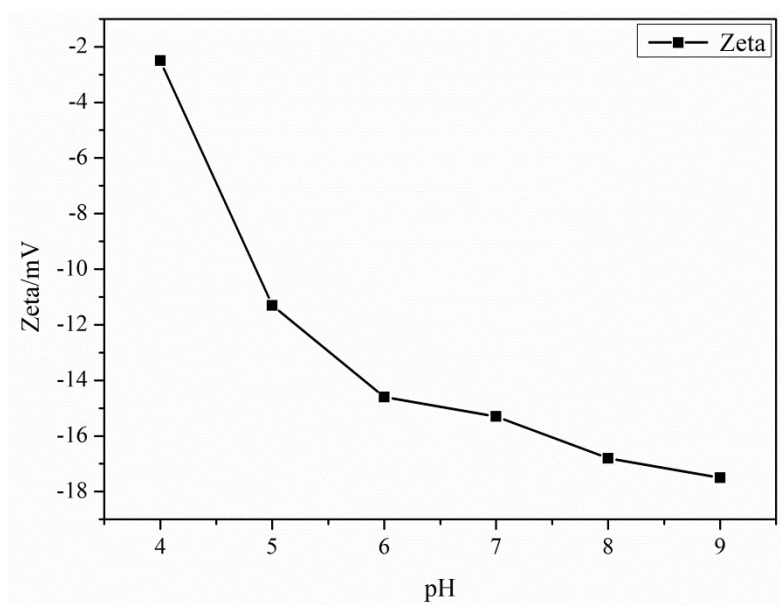

**Fig. S3** pH dependence of the  $\zeta$  potential of PAH-Ag NPs.
